# Supplementary material for: Uncover the Underlying Mechanism of Drug-Induced Myopathy by Using Systems Biology Approaches
Source: Hindawi journal article supplement (doi:10.1155/2017/9264034), 2017-01-01
Supplement: f1 [file 9264034.f1.pdf]

Table S1  
List of drugs caused mayopathy

| <b>Drug names</b>   | <b>Drugbank ID</b> | <b>PubCID</b> | <b>SIDER database link</b>                                                                          | <b>ATC code</b>                 |
|---------------------|--------------------|---------------|-----------------------------------------------------------------------------------------------------|---------------------------------|
| zalcitabine         | DB00943            | 5718          | <a href="http://sideeffects.embl.de/drugs/5718/">http://sideeffects.embl.de/drugs/5718/</a>         | J05AF03                         |
| daptomycin          | DB00080            | 16129629      | <a href="http://sideeffects.embl.de/drugs/16129629/">http://sideeffects.embl.de/drugs/16129629/</a> | J01XX09                         |
| cyclosporine        | DB00091            | 2909          | <a href="http://sideeffects.embl.de/drugs/2909/">http://sideeffects.embl.de/drugs/2909/</a>         | L04AA01                         |
| acamprosate         | DB00659            | 71158         | <a href="http://sideeffects.embl.de/drugs/71158/">http://sideeffects.embl.de/drugs/71158/</a>       | N07BB03                         |
| allopurinol         | DB00437            | 2094          | <a href="http://sideeffects.embl.de/drugs/2094/">http://sideeffects.embl.de/drugs/2094/</a>         | M04AA01                         |
| almotriptan         | DB00918            | 123606        | <a href="http://sideeffects.embl.de/drugs/123606/">http://sideeffects.embl.de/drugs/123606/</a>     | N02CC05                         |
| amiodarone          | DB01118            | 2156          | <a href="http://sideeffects.embl.de/drugs/2156/">http://sideeffects.embl.de/drugs/2156/</a>         | C01BD01                         |
| aripiprazole        | DB01238            | 60795         | <a href="http://sideeffects.embl.de/drugs/60795/">http://sideeffects.embl.de/drugs/60795/</a>       | N05AX12                         |
| atazanavir          | DB01072            | 148192        | <a href="http://sideeffects.embl.de/drugs/148192/">http://sideeffects.embl.de/drugs/148192/</a>     | J05AE08                         |
| atorvastatin        | DB01076            | 2250          | <a href="http://sideeffects.embl.de/drugs/2250/">http://sideeffects.embl.de/drugs/2250/</a>         | C10AA05                         |
| candesartan         | DB00796            | 2541          | <a href="http://sideeffects.embl.de/drugs/2541/">http://sideeffects.embl.de/drugs/2541/</a>         | C09CA06                         |
| cerivastatin sodium | DB00439            | 2676          | <a href="http://sideeffects.embl.de/drugs/2676/">http://sideeffects.embl.de/drugs/2676/</a>         | C10AA06                         |
| chloroquine         | DB00608            | 2719          | <a href="http://sideeffects.embl.de/drugs/2719/">http://sideeffects.embl.de/drugs/2719/</a>         | P01BA01 P01BA02                 |
| cisatracurium       | DB00565            | 47320         | <a href="http://sideeffects.embl.de/drugs/47320/">http://sideeffects.embl.de/drugs/47320/</a>       | M03AC11                         |
| clomipramine        | DB01242            | 2801          | <a href="http://sideeffects.embl.de/drugs/2801/">http://sideeffects.embl.de/drugs/2801/</a>         | N06AA04                         |
| colchicine          | DB01394            | 2833          | <a href="http://sideeffects.embl.de/drugs/2833/">http://sideeffects.embl.de/drugs/2833/</a>         | M04AC01                         |
| hydrocortisone      | DB00741            | 3640          | <a href="http://sideeffects.embl.de/drugs/3640/">http://sideeffects.embl.de/drugs/3640/</a>         | A01AC03 A07EA02 C05AA01 D07AA02 |
| cortisone           | DB01380            | 222786        | <a href="http://sideeffects.embl.de/drugs/222786/">http://sideeffects.embl.de/drugs/222786/</a>     | H02AB10 S01BA03                 |
| betamethasone       | DB01234            | 3003          | <a href="http://sideeffects.embl.de/drugs/3003/">http://sideeffects.embl.de/drugs/3003/</a>         | A01AC02 C05AA09 D07AB19 D07XB05 |
| didanosine          | DB00900            | 3043          | <a href="http://sideeffects.embl.de/drugs/3043/">http://sideeffects.embl.de/drugs/3043/</a>         | J05AF02                         |
| diltiazem           | DB00343            | 3075          | <a href="http://sideeffects.embl.de/drugs/3075/">http://sideeffects.embl.de/drugs/3075/</a>         | C08DB01                         |
| cromolyn            | DB01003            | 2881          | <a href="http://sideeffects.embl.de/drugs/2881/">http://sideeffects.embl.de/drugs/2881/</a>         | R01AC01 A07EB01 S01GX01 R03BC01 |
| efavirenz           | DB00625            | 3203          | <a href="http://sideeffects.embl.de/drugs/3203/">http://sideeffects.embl.de/drugs/3203/</a>         | J05AG03                         |
| eletriptan          | DB00216            | 77993         | <a href="http://sideeffects.embl.de/drugs/77993/">http://sideeffects.embl.de/drugs/77993/</a>       | N02CC06                         |
| aminocaproic acid   | DB00513            | 564           | <a href="http://sideeffects.embl.de/drugs/564/">http://sideeffects.embl.de/drugs/564/</a>           | B02AA01                         |
| ezetimibe           | DB00973            | 150311        | <a href="http://sideeffects.embl.de/drugs/150311/">http://sideeffects.embl.de/drugs/150311/</a>     | C10AX09                         |
| fentanyl            | DB00813            | 3345          | <a href="http://sideeffects.embl.de/drugs/3345/">http://sideeffects.embl.de/drugs/3345/</a>         | N01AH01 N02AB03                 |
| fludrocortisone     | DB00687            | 31378         | <a href="http://sideeffects.embl.de/drugs/31378/">http://sideeffects.embl.de/drugs/31378/</a>       | H02AA02                         |
| fluoxetine          | DB00472            | 3386          | <a href="http://sideeffects.embl.de/drugs/3386/">http://sideeffects.embl.de/drugs/3386/</a>         | N06AB03                         |
| fluvastatin         | DB01095            | 3403          | <a href="http://sideeffects.embl.de/drugs/3403/">http://sideeffects.embl.de/drugs/3403/</a>         | C10AA04                         |
| fluvoxamine         | DB00176            | 3404          | <a href="http://sideeffects.embl.de/drugs/3404/">http://sideeffects.embl.de/drugs/3404/</a>         | N06AB08                         |
| foscarnet           | DB00529            | 3414          | <a href="http://sideeffects.embl.de/drugs/3414/">http://sideeffects.embl.de/drugs/3414/</a>         | J05AD01                         |
| fosphenytoin        | DB00252            | 56338         | <a href="http://sideeffects.embl.de/drugs/56338/">http://sideeffects.embl.de/drugs/56338/</a>       | N03AB02 N03AB04 N03AB05         |
| gemfibrozil         | DB01241            | 3463          | <a href="http://sideeffects.embl.de/drugs/3463/">http://sideeffects.embl.de/drugs/3463/</a>         | C10AB04                         |
| glatiramer acetate  | DB05259            | 3081884       | <a href="http://sideeffects.embl.de/drugs/3081884/">http://sideeffects.embl.de/drugs/3081884/</a>   | L03AX13                         |
| hydroxychloroquine  | DB01611            | 3652          | <a href="http://sideeffects.embl.de/drugs/3652/">http://sideeffects.embl.de/drugs/3652/</a>         | P01BA02                         |
| indapamide          | DB00808            | 3702          | <a href="http://sideeffects.embl.de/drugs/3702/">http://sideeffects.embl.de/drugs/3702/</a>         | C03BA11                         |
| labetalol           | DB00598            | 3869          | <a href="http://sideeffects.embl.de/drugs/3869/">http://sideeffects.embl.de/drugs/3869/</a>         | C07AG01                         |
| lamivudine          | DB00709            | 3877          | <a href="http://sideeffects.embl.de/drugs/3877/">http://sideeffects.embl.de/drugs/3877/</a>         | J05AF05                         |
| leuprolide          | DB00007            | 3911          | <a href="http://sideeffects.embl.de/drugs/3911/">http://sideeffects.embl.de/drugs/3911/</a>         | L02AE02                         |
| lovastatin          | DB00227            | 3962          | <a href="http://sideeffects.embl.de/drugs/3962/">http://sideeffects.embl.de/drugs/3962/</a>         | C10AA02                         |
| methylprednisolone  | DB00959            | 4159          | <a href="http://sideeffects.embl.de/drugs/4159/">http://sideeffects.embl.de/drugs/4159/</a>         | D07AA01 D07AC14 D10AA02 H02AB04 |
| nelfinavir          | DB00220            | 4451          | <a href="http://sideeffects.embl.de/drugs/4451/">http://sideeffects.embl.de/drugs/4451/</a>         | J05AE04                         |
| niacin              | DB00627            | 937           | <a href="http://sideeffects.embl.de/drugs/937/">http://sideeffects.embl.de/drugs/937/</a>           | C04AC01 C10AD02                 |
| olanzapine          | DB00334            | 4585          | <a href="http://sideeffects.embl.de/drugs/4585/">http://sideeffects.embl.de/drugs/4585/</a>         | N05AH03                         |
| paroxetine          | DB00715            | 4691          | <a href="http://sideeffects.embl.de/drugs/4691/">http://sideeffects.embl.de/drugs/4691/</a>         | N06AB05                         |
| phenytoin           | DB00252            | 1775          | <a href="http://sideeffects.embl.de/drugs/1775/">http://sideeffects.embl.de/drugs/1775/</a>         | N03AB02 N03AB04 N03AB05         |
| pramipexole         | DB00413            | 4885          | <a href="http://sideeffects.embl.de/drugs/4885/">http://sideeffects.embl.de/drugs/4885/</a>         | N04BC05                         |
| pravastatin         | DB00175            | 4889          | <a href="http://sideeffects.embl.de/drugs/4889/">http://sideeffects.embl.de/drugs/4889/</a>         | C10AA03                         |
| prednisolone        | DB00860            | 4894          | <a href="http://sideeffects.embl.de/drugs/4894/">http://sideeffects.embl.de/drugs/4894/</a>         | A07EA01 C05AA04 D07AA01 D07AA03 |
| prednisone          | DB00635            | 4900          | <a href="http://sideeffects.embl.de/drugs/4900/">http://sideeffects.embl.de/drugs/4900/</a>         | D07AC14 D07XA02 D10AA02 H02AB04 |
| pregabalin          | DB00230            | 125889        | <a href="http://sideeffects.embl.de/drugs/125889/">http://sideeffects.embl.de/drugs/125889/</a>     | A07EA03 H02AB07 H02AB15         |
| progesterone        | DB00396            | 4920          | <a href="http://sideeffects.embl.de/drugs/4920/">http://sideeffects.embl.de/drugs/4920/</a>         | N03AX16                         |
| propoxyphene        | DB00647            | 10100         | <a href="http://sideeffects.embl.de/drugs/10100/">http://sideeffects.embl.de/drugs/10100/</a>       | G03AC06 G03DA02 G03DA03 G03DA04 |
| raltegravir         | NA                 | 11598201      | <a href="http://sideeffects.embl.de/drugs/11598201/">http://sideeffects.embl.de/drugs/11598201/</a> | N02AC04 N02AC54 N02AC74         |
| rifampin            | DB01045            | 5381226       | <a href="http://sideeffects.embl.de/drugs/5381226/">http://sideeffects.embl.de/drugs/5381226/</a>   | J05AX08                         |
| rocuronium          | DB00728            | 60695         | <a href="http://sideeffects.embl.de/drugs/60695/">http://sideeffects.embl.de/drugs/60695/</a>       | J04AB02                         |
| rofecoxib           | DB00533            | 5090          | <a href="http://sideeffects.embl.de/drugs/5090/">http://sideeffects.embl.de/drugs/5090/</a>         | M03AC09                         |
| rosuvastatin        | DB01098            | 446157        | <a href="http://sideeffects.embl.de/drugs/446157/">http://sideeffects.embl.de/drugs/446157/</a>     | M01AH02                         |
| saquinavir          | DB01232            | 60787         | <a href="http://sideeffects.embl.de/drugs/60787/">http://sideeffects.embl.de/drugs/60787/</a>       | C10AA07                         |
| selegiline          | DB01037            | 5195          | <a href="http://sideeffects.embl.de/drugs/5195/">http://sideeffects.embl.de/drugs/5195/</a>         | J05AE01                         |
| simvastatin         | DB00641            | 54454         | <a href="http://sideeffects.embl.de/drugs/54454/">http://sideeffects.embl.de/drugs/54454/</a>       | N04BD01                         |
| sumatriptan         | DB00669            | 5358          | <a href="http://sideeffects.embl.de/drugs/5358/">http://sideeffects.embl.de/drugs/5358/</a>         | C10AA01                         |
| sunitinib           | DB01268            | 3086686       | <a href="http://sideeffects.embl.de/drugs/3086686/">http://sideeffects.embl.de/drugs/3086686/</a>   | N02CC01                         |
| tacrine             | DB00382            | 1935          | <a href="http://sideeffects.embl.de/drugs/1935/">http://sideeffects.embl.de/drugs/1935/</a>         | L01XE04                         |
| temozolomide        | DB00853            | 5394          | <a href="http://sideeffects.embl.de/drugs/5394/">http://sideeffects.embl.de/drugs/5394/</a>         | N06AA18 N06DA01                 |
| viread              | DB00300            | 119830        | <a href="http://sideeffects.embl.de/drugs/119830/">http://sideeffects.embl.de/drugs/119830/</a>     | L01AX03                         |
|                     |                    |               |                                                                                                     | J05AF07                         |

Table S1

|               |         |       |                                                                                               |                                 |
|---------------|---------|-------|-----------------------------------------------------------------------------------------------|---------------------------------|
| telbivudine   | DB01265 | 1134  | <a href="http://sideeffects.embl.de/drugs/1134/">http://sideeffects.embl.de/drugs/1134/</a>   | J05AF11                         |
| tramadol      | DB00193 | 5523  | <a href="http://sideeffects.embl.de/drugs/5523/">http://sideeffects.embl.de/drugs/5523/</a>   | N02AX02                         |
| triamcinolone | DB00620 | 5544  | <a href="http://sideeffects.embl.de/drugs/5544/">http://sideeffects.embl.de/drugs/5544/</a>   | A01AC01 D07AB09 D07XB02 H02AB08 |
| venlafaxine   | DB00285 | 5656  | <a href="http://sideeffects.embl.de/drugs/5656/">http://sideeffects.embl.de/drugs/5656/</a>   | N06AX16 N06AX23                 |
| voriconazole  | DB00582 | 71616 | <a href="http://sideeffects.embl.de/drugs/71616/">http://sideeffects.embl.de/drugs/71616/</a> | J02AC03                         |
| zidovudine    | DB00495 | 5726  | <a href="http://sideeffects.embl.de/drugs/5726/">http://sideeffects.embl.de/drugs/5726/</a>   | J05AF01                         |
| ziprasidone   | DB00246 | 60853 | <a href="http://sideeffects.embl.de/drugs/60853/">http://sideeffects.embl.de/drugs/60853/</a> | N05AE04                         |
| eszopiclone   | DB01198 | 5735  | <a href="http://sideeffects.embl.de/drugs/5735/">http://sideeffects.embl.de/drugs/5735/</a>   | N05CF01                         |

Table S2  
Top 100 genes found to be related to mayopathy

| From   | To       | Species      | Gene Name                                                                                                                                                                                                                                                                                                                              |
|--------|----------|--------------|----------------------------------------------------------------------------------------------------------------------------------------------------------------------------------------------------------------------------------------------------------------------------------------------------------------------------------------|
| 8880   | FUBP1    | Homo sapiens | far upstream element (FUZE) binding protein 1                                                                                                                                                                                                                                                                                          |
| 3725   | Jun      | Homo sapiens | jun oncogene                                                                                                                                                                                                                                                                                                                           |
| 3872   | KRT17P3  | Homo sapiens | keratin 17; keratin 17 pseudogene 3                                                                                                                                                                                                                                                                                                    |
| 3872   | KRT17    | Homo sapiens | keratin 17; keratin 17 pseudogene 3                                                                                                                                                                                                                                                                                                    |
| 2099   | Esr1     | Homo sapiens | estrogen receptor 1                                                                                                                                                                                                                                                                                                                    |
| 3535   | IGLV2-11 | Homo sapiens | immunoglobulin lambda variable 2-11; immunoglobulin lambda constant 2 (Kern-Oz- marker); immunoglobulin lambda variable 1-44; immunoglobulin lambda constant 1 (Mcg marker); immunoglobulin lambda variable 1-40; immunoglobulin lambda variable 3-21; immunoglobulin lambda locus; immunoglobulin lambda constant 3 (Kern-Oz+ marker) |
| 3535   | IGLV1-40 | Homo sapiens | immunoglobulin lambda variable 2-11; immunoglobulin lambda constant 2 (Kern-Oz- marker); immunoglobulin lambda variable 1-44; immunoglobulin lambda constant 1 (Mcg marker); immunoglobulin lambda variable 1-40; immunoglobulin lambda variable 3-21; immunoglobulin lambda locus; immunoglobulin lambda constant 3 (Kern-Oz+ marker) |
| 3535   | IGLV1-44 | Homo sapiens | immunoglobulin lambda variable 2-11; immunoglobulin lambda constant 2 (Kern-Oz- marker); immunoglobulin lambda variable 1-44; immunoglobulin lambda constant 1 (Mcg marker); immunoglobulin lambda variable 1-40; immunoglobulin lambda variable 3-21; immunoglobulin lambda locus; immunoglobulin lambda constant 3 (Kern-Oz+ marker) |
| 3535   | IGL@     | Homo sapiens | immunoglobulin lambda variable 2-11; immunoglobulin lambda constant 2 (Kern-Oz- marker); immunoglobulin lambda variable 1-44; immunoglobulin lambda constant 1 (Mcg marker); immunoglobulin lambda variable 1-40; immunoglobulin lambda variable 3-21; immunoglobulin lambda locus; immunoglobulin lambda constant 3 (Kern-Oz+ marker) |
| 3535   | iglc1    | Homo sapiens | immunoglobulin lambda variable 2-11; immunoglobulin lambda constant 2 (Kern-Oz- marker); immunoglobulin lambda variable 1-44; immunoglobulin lambda constant 1 (Mcg marker); immunoglobulin lambda variable 1-40; immunoglobulin lambda variable 3-21; immunoglobulin lambda locus; immunoglobulin lambda constant 3 (Kern-Oz+ marker) |
| 3535   | iglc2    | Homo sapiens | immunoglobulin lambda variable 2-11; immunoglobulin lambda constant 2 (Kern-Oz- marker); immunoglobulin lambda variable 1-44; immunoglobulin lambda constant 1 (Mcg marker); immunoglobulin lambda variable 1-40; immunoglobulin lambda variable 3-21; immunoglobulin lambda locus; immunoglobulin lambda constant 3 (Kern-Oz+ marker) |
| 3535   | IGLV3-21 | Homo sapiens | immunoglobulin lambda variable 2-11; immunoglobulin lambda constant 2 (Kern-Oz- marker); immunoglobulin lambda variable 1-44; immunoglobulin lambda constant 1 (Mcg marker); immunoglobulin lambda variable 1-40; immunoglobulin lambda variable 3-21; immunoglobulin lambda locus; immunoglobulin lambda constant 3 (Kern-Oz+ marker) |
| 3535   | IGLC3    | Homo sapiens | immunoglobulin lambda variable 2-11; immunoglobulin lambda constant 2 (Kern-Oz- marker); immunoglobulin lambda variable 1-44; immunoglobulin lambda constant 1 (Mcg marker); immunoglobulin lambda variable 1-40; immunoglobulin lambda variable 3-21; immunoglobulin lambda locus; immunoglobulin lambda constant 3 (Kern-Oz+ marker) |
| 4929   | NR4A2    | Homo sapiens | nuclear receptor subfamily 4, group A, member 2                                                                                                                                                                                                                                                                                        |
| 414062 | CCL3L1   | Homo sapiens | chemokine (C-C motif) ligand 3-like 3; chemokine (C-C motif) ligand 3-like 1                                                                                                                                                                                                                                                           |
| 414062 | CCL3L3   | Homo sapiens | chemokine (C-C motif) ligand 3-like 3; chemokine (C-C motif) ligand 3-like 1                                                                                                                                                                                                                                                           |
| 1289   | Col5a1   | Homo sapiens | collagen, type V, alpha 1                                                                                                                                                                                                                                                                                                              |
| 5229   | Pggt1b   | Homo sapiens | protein geranylgeranyltransferase type I, beta subunit                                                                                                                                                                                                                                                                                 |
| 26707  | OR2J2    | Homo sapiens | olfactory receptor, family 2, subfamily J, member 2                                                                                                                                                                                                                                                                                    |
| 5178   | PEG3AS   | Homo sapiens | paternally expressed 3; PEG3 antisense RNA (non-protein coding); zinc finger, imprinted 2                                                                                                                                                                                                                                              |
| 5178   | ZIM2     | Homo sapiens | paternally expressed 3; PEG3 antisense RNA (non-protein coding); zinc finger, imprinted 2                                                                                                                                                                                                                                              |
| 5178   | PEG3     | Homo sapiens | paternally expressed 3; PEG3 antisense RNA (non-protein coding); zinc finger, imprinted 2                                                                                                                                                                                                                                              |

Table S2

|        |              |              |                                                                                                                            |
|--------|--------------|--------------|----------------------------------------------------------------------------------------------------------------------------|
| 26156  | Rsl1d1       | Homo sapiens | ribosomal L1 domain containing 1                                                                                           |
| 6299   | sal11        | Homo sapiens | sal-like 1 (Drosophila)                                                                                                    |
| 1080   | CFTR         | Homo sapiens | cystic fibrosis transmembrane conductance regulator (ATP-binding cassette sub-family C, member 7)                          |
| 1896   | eda          | Homo sapiens | ectodysplasin A                                                                                                            |
| 4116   | MAGOH        | Homo sapiens | mago-nashi homolog, proliferation-associated (Drosophila)                                                                  |
| 7940   | Lst1         | Homo sapiens | leukocyte specific transcript 1                                                                                            |
| 3856   | KRT8P9       | Homo sapiens | keratin 8 pseudogene 9; similar to keratin 8; keratin 8                                                                    |
| 3856   | LOC149501    | Homo sapiens | keratin 8 pseudogene 9; similar to keratin 8; keratin 8                                                                    |
| 3856   | krt8         | Homo sapiens | keratin 8 pseudogene 9; similar to keratin 8; keratin 8                                                                    |
| 6974   | TRGV2        | Homo sapiens | T cell receptor gamma variable 2                                                                                           |
| 23063  | WAPAL        | Homo sapiens | wings apart-like homolog (Drosophila)                                                                                      |
| 1519   | Ctso         | Homo sapiens | cathepsin O                                                                                                                |
| 1910   | ednrb        | Homo sapiens | endothelin receptor type B                                                                                                 |
| 23530  | Nnt          | Homo sapiens | nicotinamide nucleotide transhydrogenase                                                                                   |
| 2314   | flil         | Homo sapiens | flightless I homolog (Drosophila)                                                                                          |
| 821    | Canx         | Homo sapiens | calnexin                                                                                                                   |
| 23197  | FAF2         | Homo sapiens | Fas associated factor family member 2                                                                                      |
| 2273   | fhl1         | Homo sapiens | four and a half LIM domains 1                                                                                              |
| 5564   | PRKAB1       | Homo sapiens | protein kinase, AMP-activated, beta 1 non-catalytic subunit                                                                |
| 3320   | HSP90AA2     | Homo sapiens | heat shock protein 90kDa alpha (cytosolic), class A member 2; heat shock protein 90kDa alpha (cytosolic), class A member 1 |
| 3320   | HSP90AA1     | Homo sapiens | heat shock protein 90kDa alpha (cytosolic), class A member 2; heat shock protein 90kDa alpha (cytosolic), class A member 1 |
| 1462   | VCAN         | Homo sapiens | versican                                                                                                                   |
| 4017   | lox12        | Homo sapiens | lysyl oxidase-like 2                                                                                                       |
| 5050   | PAFAH1B3     | Homo sapiens | platelet-activating factor acetylhydrolase, isoform Ib, subunit 3 (29kDa)                                                  |
| 27006  | FGF22        | Homo sapiens | fibroblast growth factor 22                                                                                                |
| 27005  | USP21        | Homo sapiens | ubiquitin specific peptidase 21                                                                                            |
| 3119   | HLA-DQB1     | Homo sapiens | major histocompatibility complex, class II, DQ beta 1; similar to major histocompatibility complex, class II, DQ beta 1    |
| 3119   | LOC100133583 | Homo sapiens | major histocompatibility complex, class II, DQ beta 1; similar to major histocompatibility complex, class II, DQ beta 1    |
| 286451 | YIPF6        | Homo sapiens | Yip1 domain family, member 6                                                                                               |
| 2778   | Gnas         | Homo sapiens | GNAS complex locus                                                                                                         |
| 5621   | PRNP         | Homo sapiens | prion protein                                                                                                              |
| 7430   | EZR          | Homo sapiens | hypothetical protein LOC100129652; ezrin                                                                                   |
| 7430   | LOC100129652 | Homo sapiens | hypothetical protein LOC100129652; ezrin                                                                                   |
| 9229   | dlgap1       | Homo sapiens | discs, large (Drosophila) homolog-associated protein 1                                                                     |
| 114884 | OSBPL10      | Homo sapiens | oxysterol binding protein-like 10                                                                                          |
| 3425   | ldua         | Homo sapiens | iduronidase, alpha-L-                                                                                                      |
| 6382   | sdc1         | Homo sapiens | syndecan 1                                                                                                                 |
| 4772   | nfatc1       | Homo sapiens | nuclear factor of activated T-cells, cytoplasmic, calcineurin-dependent 1                                                  |
| 998    | Cdc42        | Homo sapiens | cell division cycle 42 (GTP binding protein, 25kDa); cell division cycle 42 pseudogene 2                                   |
| 998    | CDC42P2      | Homo sapiens | cell division cycle 42 (GTP binding protein, 25kDa); cell division cycle 42 pseudogene 2                                   |
| 4149   | MAX          | Homo sapiens | MYC associated factor X                                                                                                    |
| 4147   | Matn2        | Homo sapiens | matrilin 2                                                                                                                 |
| 7026   | NR2F2        | Homo sapiens | nuclear receptor subfamily 2, group F, member 2                                                                            |
| 1937   | EEF1G        | Homo sapiens | eukaryotic translation elongation factor 1 gamma                                                                           |
| 8572   | PDLIM4       | Homo sapiens | PDZ and LIM domain 4                                                                                                       |
| 54454  | atad2b       | Homo sapiens | ATPase family, AAA domain containing 2B                                                                                    |
| 5912   | RAP2B        | Homo sapiens | RAP2B, member of RAS oncogene family                                                                                       |
| 27239  | GPR162       | Homo sapiens | G protein-coupled receptor 162                                                                                             |
| 7991   | TUSC3        | Homo sapiens | tumor suppressor candidate 3                                                                                               |
| 2192   | FBLN1        | Homo sapiens | fibulin 1                                                                                                                  |
| 3964   | LGALS8       | Homo sapiens | lectin, galactoside-binding, soluble, 8                                                                                    |



Table S2

|       |          |              |                                                                                                                                                                                                                                                                                                   |
|-------|----------|--------------|---------------------------------------------------------------------------------------------------------------------------------------------------------------------------------------------------------------------------------------------------------------------------------------------------|
| 2575  | GAGE4    | Homo sapiens | G antigen 2A; G antigen 2B; G antigen 12I; G antigen 12F; G antigen 2E; G antigen 12G; G antigen 12D; G antigen 1; G antigen 2C; G antigen 12E; G antigen 2D; G antigen 12B; G antigen 3; G antigen 4; G antigen 12C; G antigen 5; G antigen 6; G antigen 7; G antigen 8                          |
| 2575  | GAGE7    | Homo sapiens | G antigen 2A; G antigen 2B; G antigen 12I; G antigen 12F; G antigen 2E; G antigen 12G; G antigen 12D; G antigen 1; G antigen 2C; G antigen 12E; G antigen 2D; G antigen 12B; G antigen 3; G antigen 4; G antigen 12C; G antigen 5; G antigen 6; G antigen 7; G antigen 8                          |
| 2575  | GAGE12I  | Homo sapiens | G antigen 2A; G antigen 2B; G antigen 12I; G antigen 12F; G antigen 2E; G antigen 12G; G antigen 12D; G antigen 1; G antigen 2C; G antigen 12E; G antigen 2D; G antigen 12B; G antigen 3; G antigen 4; G antigen 12C; G antigen 5; G antigen 6; G antigen 7; G antigen 8                          |
| 2575  | GAGE6    | Homo sapiens | G antigen 2A; G antigen 2B; G antigen 12I; G antigen 12F; G antigen 2E; G antigen 12G; G antigen 12D; G antigen 1; G antigen 2C; G antigen 12E; G antigen 2D; G antigen 12B; G antigen 3; G antigen 4; G antigen 12C; G antigen 5; G antigen 6; G antigen 7; G antigen 8                          |
| 2575  | GAGE8    | Homo sapiens | G antigen 2A; G antigen 2B; G antigen 12I; G antigen 12F; G antigen 2E; G antigen 12G; G antigen 12D; G antigen 1; G antigen 2C; G antigen 12E; G antigen 2D; G antigen 12B; G antigen 3; G antigen 4; G antigen 12C; G antigen 5; G antigen 6; G antigen 7; G antigen 8                          |
| 780   | DDR1     | Homo sapiens | discoidin domain receptor tyrosine kinase 1                                                                                                                                                                                                                                                       |
| 1137  | Chrna4   | Homo sapiens | cholinergic receptor, nicotinic, alpha 4                                                                                                                                                                                                                                                          |
| 9612  | ncor2    | Homo sapiens | nuclear receptor co-repressor 2                                                                                                                                                                                                                                                                   |
| 6738  | Trove2   | Homo sapiens | TROVE domain family, member 2                                                                                                                                                                                                                                                                     |
| 2618  | GART     | Homo sapiens | phosphoribosylglycinamide formyltransferase, phosphoribosylglycinamide synthetase, phosphoribosylaminoimidazole synthetase                                                                                                                                                                        |
| 2262  | Gpc5     | Homo sapiens | glypican 5                                                                                                                                                                                                                                                                                        |
| 55612 | FERMT1   | Homo sapiens | fermitin family homolog 1 (Drosophila)                                                                                                                                                                                                                                                            |
| 2113  | ETS1     | Homo sapiens | v-ets erythroblastosis virus E26 oncogene homolog 1 (avian)                                                                                                                                                                                                                                       |
| 9788  | mtss1    | Homo sapiens | metastasis suppressor 1                                                                                                                                                                                                                                                                           |
| 4162  | MCAM     | Homo sapiens | melanoma cell adhesion molecule                                                                                                                                                                                                                                                                   |
| 4168  | MCF2     | Homo sapiens | MCF.2 cell line derived transforming sequence                                                                                                                                                                                                                                                     |
| 861   | Runx1    | Homo sapiens | runt-related transcription factor 1                                                                                                                                                                                                                                                               |
| 3500  | IGHV3-11 | Homo sapiens | immunoglobulin heavy constant gamma 1 (G1m marker); immunoglobulin heavy constant mu; immunoglobulin heavy variable 3-7; immunoglobulin heavy constant gamma 3 (G3m marker); immunoglobulin heavy variable 3-11 (gene/pseudogene); immunoglobulin heavy variable 4-31; immunoglobulin heavy locus |
| 3500  | IGHV3-7  | Homo sapiens | immunoglobulin heavy constant gamma 1 (G1m marker); immunoglobulin heavy constant mu; immunoglobulin heavy variable 3-7; immunoglobulin heavy constant gamma 3 (G3m marker); immunoglobulin heavy variable 3-11 (gene/pseudogene); immunoglobulin heavy variable 4-31; immunoglobulin heavy locus |
| 3500  | IGHG3    | Homo sapiens | immunoglobulin heavy constant gamma 1 (G1m marker); immunoglobulin heavy constant mu; immunoglobulin heavy variable 3-7; immunoglobulin heavy constant gamma 3 (G3m marker); immunoglobulin heavy variable 3-11 (gene/pseudogene); immunoglobulin heavy variable 4-31; immunoglobulin heavy locus |
| 3500  | Ighg1    | Homo sapiens | immunoglobulin heavy constant gamma 1 (G1m marker); immunoglobulin heavy constant mu; immunoglobulin heavy variable 3-7; immunoglobulin heavy constant gamma 3 (G3m marker); immunoglobulin heavy variable 3-11 (gene/pseudogene); immunoglobulin heavy variable 4-31; immunoglobulin heavy locus |
| 3500  | IGH@     | Homo sapiens | immunoglobulin heavy constant gamma 1 (G1m marker); immunoglobulin heavy constant mu; immunoglobulin heavy variable 3-7; immunoglobulin heavy constant gamma 3 (G3m marker); immunoglobulin heavy variable 3-11 (gene/pseudogene); immunoglobulin heavy variable 4-31; immunoglobulin heavy locus |
| 3500  | IGHM     | Homo sapiens | immunoglobulin heavy constant gamma 1 (G1m marker); immunoglobulin heavy constant mu; immunoglobulin heavy variable 3-7; immunoglobulin heavy constant gamma 3 (G3m marker); immunoglobulin heavy variable 3-11 (gene/pseudogene); immunoglobulin heavy variable 4-31; immunoglobulin heavy locus |

Table S2

|        |              |              |                                                                                                                                                                                                                                                                                                   |
|--------|--------------|--------------|---------------------------------------------------------------------------------------------------------------------------------------------------------------------------------------------------------------------------------------------------------------------------------------------------|
| 3500   | ighv4-31     | Homo sapiens | immunoglobulin heavy constant gamma 1 (G1m marker); immunoglobulin heavy constant mu; immunoglobulin heavy variable 3-7; immunoglobulin heavy constant gamma 3 (G3m marker); immunoglobulin heavy variable 3-11 (gene/pseudogene); immunoglobulin heavy variable 4-31; immunoglobulin heavy locus |
| 3705   | ITPK1        | Homo sapiens | inositol 1,3,4-triphosphate 5/6 kinase                                                                                                                                                                                                                                                            |
| 606500 | SNORD68      | Homo sapiens | small nucleolar RNA, C/D box 68                                                                                                                                                                                                                                                                   |
| 4128   | MAOA         | Homo sapiens | monoamine oxidase A                                                                                                                                                                                                                                                                               |
| 5087   | PBX1         | Homo sapiens | pre-B-cell leukemia homeobox 1                                                                                                                                                                                                                                                                    |
| 7001   | PRDX2        | Homo sapiens | peroxiredoxin 2                                                                                                                                                                                                                                                                                   |
| 3709   | ITPR2        | Homo sapiens | inositol 1,4,5-triphosphate receptor, type 2                                                                                                                                                                                                                                                      |
| 5662   | psd          | Homo sapiens | pleckstrin and Sec7 domain containing                                                                                                                                                                                                                                                             |
| 3507   | IGHV3-11     | Homo sapiens | immunoglobulin heavy constant gamma 1 (G1m marker); immunoglobulin heavy constant mu; immunoglobulin heavy variable 3-7; immunoglobulin heavy constant gamma 3 (G3m marker); immunoglobulin heavy variable 3-11 (gene/pseudogene); immunoglobulin heavy variable 4-31; immunoglobulin heavy locus |
| 3507   | IGHV3-7      | Homo sapiens | immunoglobulin heavy constant gamma 1 (G1m marker); immunoglobulin heavy constant mu; immunoglobulin heavy variable 3-7; immunoglobulin heavy constant gamma 3 (G3m marker); immunoglobulin heavy variable 3-11 (gene/pseudogene); immunoglobulin heavy variable 4-31; immunoglobulin heavy locus |
| 3507   | IGHG3        | Homo sapiens | immunoglobulin heavy constant gamma 1 (G1m marker); immunoglobulin heavy constant mu; immunoglobulin heavy variable 3-7; immunoglobulin heavy constant gamma 3 (G3m marker); immunoglobulin heavy variable 3-11 (gene/pseudogene); immunoglobulin heavy variable 4-31; immunoglobulin heavy locus |
| 3507   | Ighg1        | Homo sapiens | immunoglobulin heavy constant gamma 1 (G1m marker); immunoglobulin heavy constant mu; immunoglobulin heavy variable 3-7; immunoglobulin heavy constant gamma 3 (G3m marker); immunoglobulin heavy variable 3-11 (gene/pseudogene); immunoglobulin heavy variable 4-31; immunoglobulin heavy locus |
| 3507   | IGH@         | Homo sapiens | immunoglobulin heavy constant gamma 1 (G1m marker); immunoglobulin heavy constant mu; immunoglobulin heavy variable 3-7; immunoglobulin heavy constant gamma 3 (G3m marker); immunoglobulin heavy variable 3-11 (gene/pseudogene); immunoglobulin heavy variable 4-31; immunoglobulin heavy locus |
| 3507   | IGHM         | Homo sapiens | immunoglobulin heavy constant gamma 1 (G1m marker); immunoglobulin heavy constant mu; immunoglobulin heavy variable 3-7; immunoglobulin heavy constant gamma 3 (G3m marker); immunoglobulin heavy variable 3-11 (gene/pseudogene); immunoglobulin heavy variable 4-31; immunoglobulin heavy locus |
| 3507   | ighv4-31     | Homo sapiens | immunoglobulin heavy constant gamma 1 (G1m marker); immunoglobulin heavy constant mu; immunoglobulin heavy variable 3-7; immunoglobulin heavy constant gamma 3 (G3m marker); immunoglobulin heavy variable 3-11 (gene/pseudogene); immunoglobulin heavy variable 4-31; immunoglobulin heavy locus |
| 26105  | DKFZP434C153 | Homo sapiens | DKFZP434C153 protein                                                                                                                                                                                                                                                                              |
| 3178   | LOC644037    | Homo sapiens | heterogeneous nuclear ribonucleoprotein A1-like 3; similar to heterogeneous nuclear ribonucleoprotein A1; heterogeneous nuclear ribonucleoprotein A1 pseudogene 2; heterogeneous nuclear ribonucleoprotein A1; heterogeneous nuclear ribonucleoprotein A1 pseudogene                              |
| 3178   | LOC645691    | Homo sapiens | heterogeneous nuclear ribonucleoprotein A1-like 3; similar to heterogeneous nuclear ribonucleoprotein A1; heterogeneous nuclear ribonucleoprotein A1 pseudogene 2; heterogeneous nuclear ribonucleoprotein A1; heterogeneous nuclear ribonucleoprotein A1 pseudogene                              |
| 3178   | HNRPA1L-2    | Homo sapiens | heterogeneous nuclear ribonucleoprotein A1-like 3; similar to heterogeneous nuclear ribonucleoprotein A1; heterogeneous nuclear ribonucleoprotein A1 pseudogene 2; heterogeneous nuclear ribonucleoprotein A1; heterogeneous nuclear ribonucleoprotein A1 pseudogene                              |
| 3178   | LOC728643    | Homo sapiens | heterogeneous nuclear ribonucleoprotein A1-like 3; similar to heterogeneous nuclear ribonucleoprotein A1; heterogeneous nuclear ribonucleoprotein A1 pseudogene 2; heterogeneous nuclear ribonucleoprotein A1; heterogeneous nuclear ribonucleoprotein A1 pseudogene                              |

Table S2

|        |           |              |                                                                                                                                                                                                                                                                      |
|--------|-----------|--------------|----------------------------------------------------------------------------------------------------------------------------------------------------------------------------------------------------------------------------------------------------------------------|
| 3178   | HNRNPA1P2 | Homo sapiens | heterogeneous nuclear ribonucleoprotein A1-like 3; similar to heterogeneous nuclear ribonucleoprotein A1; heterogeneous nuclear ribonucleoprotein A1 pseudogene 2; heterogeneous nuclear ribonucleoprotein A1; heterogeneous nuclear ribonucleoprotein A1 pseudogene |
| 3178   | HNRNPA1   | Homo sapiens | heterogeneous nuclear ribonucleoprotein A1-like 3; similar to heterogeneous nuclear ribonucleoprotein A1; heterogeneous nuclear ribonucleoprotein A1 pseudogene 2; heterogeneous nuclear ribonucleoprotein A1; heterogeneous nuclear ribonucleoprotein A1 pseudogene |
| 3178   | HNRPA1L3  | Homo sapiens | heterogeneous nuclear ribonucleoprotein A1-like 3; similar to heterogeneous nuclear ribonucleoprotein A1; heterogeneous nuclear ribonucleoprotein A1 pseudogene 2; heterogeneous nuclear ribonucleoprotein A1; heterogeneous nuclear ribonucleoprotein A1 pseudogene |
| 2528   | FUT6      | Homo sapiens | fucosyltransferase 6 (alpha (1,3) fucosyltransferase)                                                                                                                                                                                                                |
| 5460   | pou5f1    | Homo sapiens | POU class 5 homeobox 1                                                                                                                                                                                                                                               |
| 284443 | ZNF493    | Homo sapiens | zinc finger protein 493                                                                                                                                                                                                                                              |
| 3554   | Il1r1     | Homo sapiens | interleukin 1 receptor, type I                                                                                                                                                                                                                                       |
| 2733   | GLE1      | Homo sapiens | GLE1 RNA export mediator homolog (yeast)                                                                                                                                                                                                                             |
| 3275   | PRMT2     | Homo sapiens | protein arginine methyltransferase 2                                                                                                                                                                                                                                 |
| 4137   | mapt      | Homo sapiens | microtubule-associated protein tau                                                                                                                                                                                                                                   |
| 1017   | Cdk2      | Homo sapiens | cyclin-dependent kinase 2                                                                                                                                                                                                                                            |
| 5902   | RanBP1    | Homo sapiens | similar to RAN binding protein 1; RAN binding protein 1                                                                                                                                                                                                              |
| 5902   | LOC389842 | Homo sapiens | similar to RAN binding protein 1; RAN binding protein 1                                                                                                                                                                                                              |
| 5902   | LOC727803 | Homo sapiens | similar to RAN binding protein 1; RAN binding protein 1                                                                                                                                                                                                              |
| 355    | Fas       | Homo sapiens | Fas (TNF receptor superfamily, member 6)                                                                                                                                                                                                                             |
| 358    | aqp1      | Homo sapiens | aquaporin 1 (Colton blood group)                                                                                                                                                                                                                                     |
| 55341  | lsg1      | Homo sapiens | large subunit GTPase 1 homolog ( <i>S. cerevisiae</i> )                                                                                                                                                                                                              |
| 5298   | PI4KB     | Homo sapiens | phosphatidylinositol 4-kinase, catalytic, beta                                                                                                                                                                                                                       |
| 2035   | epb41     | Homo sapiens | erythrocyte membrane protein band 4.1 (elliptocytosis 1, RH-linked)                                                                                                                                                                                                  |
| 65220  | nadK      | Homo sapiens | NAD kinase                                                                                                                                                                                                                                                           |
| 1209   | CLPTM1    | Homo sapiens | cleft lip and palate associated transmembrane protein 1                                                                                                                                                                                                              |
